# Supplementary material
Source: Springer Nature journal article supplement (https://www.springerprofessional.de/resource/supplementary/13688_2014_33_MOESM17_ESM.pdf/11893792)

AVG Product Purchases

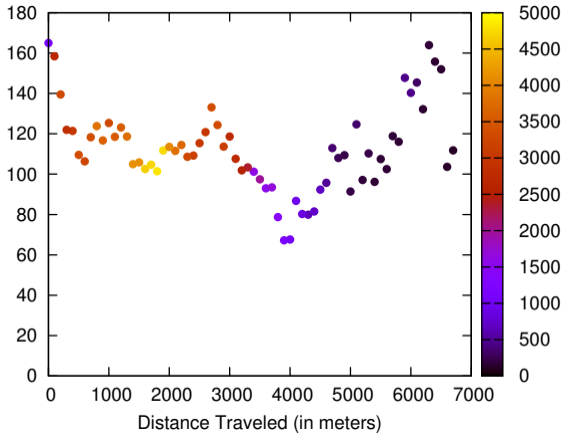

Supplement: MOESM17 [file 11893792]
